# Supplementary material for: The molecular infrastructure of glutamatergic synapses in the mammalian forebrain
Source: eLife. 2025 Sep 25;13:RP100335. doi: 10.7554/eLife.100335 (PMC12463394; doi:10.7554/eLife.100335)
Supplement: Figure 1—source data 1. [file elife-100335-fig1-data1.xlsx]

## Sheet: Sheet1
				PoSM																					PreSM																						Vicinal compartments
Mouse ID	Tomogram ID	Psd95-GFP (cryoCLEM)	VPP tomomgram	Closed compartment	No. clefts	Cleft iGluR	Perisynaptic/non-cleft iGluR	F-Actin	Microtubule	Vesicle attached to microtubule	Intracellular membrane-bound organelle	Polyhedral membrane	Flat/tubular membane	Vesicle	Vesicle with membrane protein cluster	Multivesicular body	Fission/Fusion intermediate	Clathrin cage	Membrane-clathrin cage	Mitochondrion	Ribosome	20-100 nm homogeneous electron dense sphere	20-40 nm protein ring	Membrane disc	Closed compartment	No. clefts	Synaptic vesicles	Dense-cored vesicle	Docked vesicle	F-Actin	Microtubule	Vesicle attached to microtubule	Intrcellular membrane-bound organelle	Polyhedral membrane	Flat/tubular membrane	Multivesicular body	Vesicle with membrane protein cluster	Fission/Fusion intermediate	Clathrin cage	Membrane-clathrin cage	Mitochondrion	Mitochondrial fission/fusion intermediate	Ribosome	20-100 nm homogeneous electron dense sphere	20-40 nm potein ring	Membrane disc	F-actin	Microtubule	Vesicle attached to microtubule
GGR1	D00_TS_01.rec	1	0	0	1	1	-	1	-	-	-	-	-	-	-	-	-	-	-	-	-	-	-	-	1	1	1	0	1	1	0	0	1	0	0	0	1	0	0	0	1	0	0	0	0	0	0	0	0
GGR1	D00_TS_03.rec	1	0	1	1	1	0	1	0	-	1	0	0	1	0	0	0	0	0	0	0	0	0	0	1	1	1	0	1	0	0	0	0	0	0	0	0	1	0	0	0	-	0	0	0	0	0	1	0
GGR1	D00_TS_03.rec	1	0	1	1	1	0	1	0	-	0	0	0	0	0	0	0	0	0	0	0	0	0	0	1	1	1	0	1	0	0	0	1	0	0	0	0	0	0	0	1	0	0	0	0	0	1	0	0
GGR1	D00_TS_05.rec	1	0	1	4	1	0	1	0	-	1	0	0	1	1	0	0	0	0	0	0	0	0	0	1	1	1	0	1	0	1	0	1	0	0	1	1	0	0	0	1	0	0	0	0	0	0	1	0
GGR1	D00_TS_06.rec	1	0	1	2	1	0	1	0	-	1	0	0	1	1	1	0	0	0	0	0	0	0	0	1	1	1	0	1	1	0	0	1	1	0	0	0	0	0	0	0	-	0	0	0	0	1	0	0
GGR1	D00_TS_07.rec	1	0	2	1	1	-	1	-	-	-	-	-	-	-	-	-	-	-	-	-	-	-	-	1	1	1	0	1	0	0	0	0	0	0	0	0	0	0	0	0	-	0	0	0	0	0	0	0
GGR1	D00_TS_08.rec	1	0	1	1	1	0	1	0	-	1	0	0	1	0	0	0	0	0	0	0	0	0	0	1	1	1	1	1	0	0	0	1	0	0	0	0	0	0	0	1	0	0	0	0	0	-	-	-
GGR1	D00_TS_09.rec	1	0	0	1	1	-	1	-	-	-	-	-	-	-	-	-	-	-	-	-	-	-	-	1	1	1	0	1	1	0	0	1	0	1	0	1	0	0	0	0	-	0	0	1	0	1	0	0
GGR1	D00_TS_10.rec	1	0	1	1	1	1	1	0	-	0	0	0	0	0	0	0	0	0	0	0	0	0	0	1	1	1	0	1	0	0	0	1	0	0	0	1	0	0	0	0	-	0	0	1	0	1	1	0
GGR1	D00_TS_11.rec	1	0	0	1	0	-	1	-	-	-	-	-	-	-	-	-	-	-	-	-	-	-	-	1	1	1	0	1	1	0	0	0	0	0	0	0	0	0	0	0	-	0	0	0	0	1	1	0
GGR1	D00_TS_12.rec	1	0	1	1	1	0	1	0	-	1	0	0	1	0	0	0	0	0	0	0	0	0	0	1	1	1	0	1	1	0	0	1	0	0	1	0	0	0	0	1	0	0	0	0	0	0	0	0
GGR1	D00_TS_13.rec	1	0	1	1	1	0	1	0	-	0	0	0	0	0	0	0	0	0	0	0	0	1	0	1	1	1	0	1	1	0	0	1	0	0	0	0	0	0	0	1	0	0	0	1	0	0	1	0
GGR1	D00_TS_14.rec	1	0	1	1	1	0	1	0	-	1	0	0	1	0	0	0	0	0	0	0	0	0	0	1	1	1	0	1	0	0	0	1	0	0	0	1	0	0	0	0	-	0	0	0	0	0	0	0
GGR1	D00_TS_15.rec	1	0	1	1	1	0	1	0	-	1	1	1	1	1	1	0	0	0	0	0	0	1	0	0	1	-	-	-	-	-	-	-	-	-	-	-	-	-		-	-	-	-	-	-	0	0	0
GGR2	D01_TS_02.rec	1	1	1	1	1	1	1	0	-	0	0	0	0	0	0	0	0	0	0	0	0	0	0	1	1	1	0	1	0	0	0	0	0	0	0	0	1	0	0	0	-	0	0	0	0	0	1	0
GGR2	D01_TS_03.rec	1	1	1	1	1	0	1	0	-	1	1	0	0	0	0	0	0	0	0	0	0	0	0	1	2	1	1	1	0	0	0	1	0	0	0	0	0	0	0	1	1	0	0	1	0	1	0	0
GGR2	D01_TS_04.rec	1	1	1	1	1	1	1	0	-	1	1	0	0	0	0	0	0	0	0	0	0	0	0	1	1	1	0	1	0	0	0	0	0	0	0	0	1	0	0	0	-	0	0	1	0	1	1	0
GGR2	D01_TS_05.rec	1	1	1	2	1	1	1	0	-	0	0	0	0	0	0	1	0	0	0	0	0	0	0	1	2	1	0	1	1	0	0	1	0	0	0	1	1	1	1	0	-	0	0	1	0	0	0	0
GGR2	D01_TS_06.rec	1	1	1	1	1	1	1	0	-	0	0	0	0	0	0	0	0	0	0	0	0	0	0	1	1	1	1	1	0	0	0	1	0	0	0	1	1	0	0	0	-	0	0	0	0	-	-	-
GGR2	D01_TS_07.rec	1	1	1	1	1	0	1	0	-	1	1	0	0	0	0	0	0	0	0	0	1	1	0	1	1	1	1	1	0	0	0	1	0	0	0	0	1	0	0	1	0	0	0	0	0	0	0	0
GGR2	D01_TS_08.rec	1	1	1	1	1	0	1	0	-	0	0	0	0	0	0	0	0	0	0	0	0	0	0	0	1	-	-	-	-	-	-	-	-	-	-	-	-	-		-	-	-	-	-	-	1	1	0
GGR2	D01_TS_09.rec	1	1	1	1	1	1	1	0	-	1	1	1	1	1	0	0	1	0	0	0	0	0	0	1	1	1	1	1	0	0	0	0	0	0	0	0	0	0	0	0	-	0	0	1	0	0	0	0
GGR2	D02_TS_01.rec	1	1	1	1	1	0	1	0	-	0	0	0	0	0	0	0	0	0	0	0	0	0	0	1	1	1	0	1	1	0	0	1	0	0	0	1	0	0	0	1	0	0	0	1	0	0	0	0
GGR2	D02_TS_02.rec	1	1	1	1	1	0	1	0	-	1	0	0	1	1	1	0	0	0	0	0	0	0	0	0	2	-	-	-	-	-	-	-	-	-	-	-	-	-		-	-	-	-	-	-	1	0	0
GGR2	D02_TS_03.rec	1	1	1	1	1	0	1	0	-	0	0	0	0	0	0	0	0	0	0	0	0	0	0	1	2	1	1	1	0	1	0	1	0	0	0	0	1	0	0	1	0	0	0	0	0	0	0	0
GGR2	D02_TS_04.rec	1	1	0	1	1	1	1	0	-	1	1	0	1	1	0	0	0	0	1	0	0	0	0	1	1	1	0	1	1	0	0	1	0	0	0	0	1	1	1	1	0	0	0	0	0	-	-	-
GGR2	D02_TS_05.rec	1	1	1	1	1	0	1	0	-	0	0	0	0	0	0	0	0	0	0	0	0	0	0	1	1	1	0	0	0	0	0	1	0	0	0	0	0	0	0	1	0	0	0	0	0	0	1	0
GGR2	D02_TS_06.rec	1	1	1	1	1	1	1	0	-	0	0	0	0	0	0	0	0	0	0	0	0	0	0	1	1	1	0	1	0	1	0	1	0	1	0	1	0	0	0	0	-	0	0	1	0	1	1	0
GGR2	D02_TS_07.rec	1	1	1	1	1	0	1	0	-	1	0	1	1	0	0	0	0	0	0	0	0	0	0	1	1	1	1	1	1	0	0	1	0	0	0	1	0	0	0	0	-	0	0	1	0	1	0	0
GGR2	D02_TS_09.rec	1	1	1	1	1	0	1	0	-	1	1	0	1	0	0	0	0	0	0	0	0	0	0	1	1	1	0	1	0	1	0	1	0	0	0	0	1	0	0	1	0	0	0	0	0	0	0	0
GGR2	D02_TS_10.rec	1	1	1	1	1	1	1	0	-	1	1	0	1	1	1	1	1	1	0	0	1	0	0	1	1	1	0	1	0	0	0	0	0	0	0	0	0	0	0	0	-	0	0	0	0	0	0	0
GGR2	D02_TS_11.rec	1	1	1	1	1	0	1	0	-	1	0	0	1	1	0	0	0	0	0	0	0	0	0	0	1	-	-	-	-	-	-	-	-	-	-	-	-	-		-	-	-	-	-	-	-	-	-
GGR2	D02_TS_13.rec	1	1	0	1	1	-	1	-	-	-	-	-	-	-	-	-	-	-	-	-	-	-	-	0	1	-	-	-	-	-	-	-	-	-	-	-	-	-		-	-	-	-	-	-	0	0	0
GGR2	D02_TS_14.rec	1	1	1	1	1	0	1	0	-	0	0	0	0	0	0	0	0	0	0	0	0	0	0	1	1	1	0	1	0	0	0	1	0	0	0	0	1	0	0	1	0	0	0	1	0	-	-	-
GGR2	D02_TS_15.rec	1	1	1	1	1	0	1	0	-	1	0	0	1	1	0	0	0	0	0	0	0	0	0	1	2	1	1	1	0	0	0	1	0	1	0	1	1	0	0	0	-	0	0	1	0	1	1	0
GGR2	D02_TS_16.rec	1	1	1	1	1	0	1	0	-	0	0	0	0	0	0	0	0	0	0	0	1	0	0	1	1	1	0	1	1	0	0	1	0	1	0	0	0	0	0	1	1	0	0	0	0	-	-	-
GGR3	D02_TS_17.rec	1	1	1	1	1	1	1	0	-	1	0	0	1	0	0	0	1	0	0	1	0	0	0	1	1	1	1	1	0	1	1	1	0	0	0	0	1	0	0	1	1	0	0	0	0	1	0	0
GGR3	D03_TS_01.rec	1	1	0	1	1	-	1	-	-	-	-	-	-	-	-	-	-	-	-	-	-	-	-	1	1	1	1	1	1	1	0	1	0	1	0	0	0	0	0	1	0	0	0	0	0	0	0	0
GGR3	D03_TS_02.rec	1	1	1	1	1	1	1	0	-	0	0	0	0	0	0	0	0	0	0	0	0	0	0	1	1	1	0	1	0	0	0	1	1	1	0	1	1	1	1	1	1	0	0	0	0	0	0	0
GGR3	D03_TS_03.rec	1	1	0	1	1	-	1	-	-	-	-	-	-	-	-	-	-	-	-	-	-	-	-	0	1	-	-	-	-	-	-	-	-	-	-	-	-	-		-	-	-	-	-	-	0	0	0
GGR3	D03_TS_04.rec	1	1	1	1	1	1	1	0	-	0	0	0	0	0	0	0	0	0	0	0	0	0	0	0	1	-	-	-	-	-	-	-	-	-	-	-	-	-		-	-	-	-	-	-	1	1	0
GGR3	D03_TS_05.rec	1	1	1	1	1	0	1	0	-	1	1	0	1	0	0	0	0	0	0	0	0	0	0	1	1	1	0	1	0	0	0	0	0	0	0	0	0	1	0	0	-	0	0	0	0	1	1	0
GGR3	D03_TS_06.rec	1	1	1	0	0	0	1	0	-	1	0	0	1	1	0	0	0	0	0	1	0	1	0	0	1	-	-	-	-	-	-	-	-	-	-	-	-	-		-	-	-	-	-	-	1	0	0
GGR3	D03_TS_07.rec	1	1	0	1	0	-	1	-	-	-	-	-	-	-	-	-	-	-	-	-	-	-	-	-	-	-	-	-	-	-	-	-	-	-	-	-	-	-		-	-	-	-	-	-	-	-	-
GGR3	D03_TS_08.rec	1	1	1	1	1	0	1	0	-	1	0	0	1	t	0	0	t	-	0	1	1	0	0	1	1	1	1	1	0	0	0	1	0	0	0	1	0	0	0	0	-	0	0	1	0	1	0	0
GGR3	D03_TS_09.rec	1	1	0	1	1	-	1	-	-	-	-	-	-	-	-	-	-	-	-	-	-	-	-	0	1	-	-	-	-	-	-	-	-	-	-	-	-	-		-	-	-	-	-	-	0	0	0
GGR3	D03_TS_10.rec	1	1	1	1	1	0	1	0	-	1	0	0	1	1	0	0	0	0	0	0	0	0	0	1	1	1	0	1	1	0	0	0	0	0	0	0	1	1	1	0	-	0	0	0	0	1	1	0
GGR3	D03_TS_11.rec	1	1	0	1	1	-	1	-	-	-	-	-	-	-	-	-	-	-	-	-	-	-	-	1	1	1	0	1	1	0	0	1	0	0	0	1	1	0	0	0	-	0	0	0	0	1	0	0
GGR3	D03_TS_12.rec	1	1	1	1	1	0	1	0	-	1	0	0	1	0	0	0	0	0	0	1	0	0	0	1	1	1	0	0	0	0	0	0	0	0	0	0	0	0	0	0	-	0	0	0	0	0	0	0
GGR3	D03_TS_13.rec	1	1	1	1	1	0	1	0	-	1	0	0	1	0	0	0	0	0	0	0	1	0	0	1	1	1	0	1	1	0	0	1	0	0	0	1	1	0	0	0	-	0	0	0	1	1	0	0
GGR3	D03_TS_14.rec	1	1	1	1	1	0	1	0	-	1	0	0	1	1	1	0	0	0	0	0	1	0	0	1	1	1	1	1	0	0	0	1	0	0	0	0	0	0	0	1	0	0	0	0	1	1	0	0
GGR3	D03_TS_16.rec	1	1	1	1	1	1	1	0	-	1	0	0	1	1	0	0	0	0	0	0	0	0	0	0	1	-	-	-	-	-	-	-	-		-	-	-	-		-	-	-	-	-	-	1	1	1
GGR4	D04_TS_02.rec	1	1	1	1	1	0	1	0	-	0	0	0	0	0	0	0	0	0	0	0	0	0	0	0	1	-	-	-	-	-	-	-	-	-	-	-	-	-		-	-	-	-	-	-	1	0	0
GGR4	D04_TS_03.rec	1	1	1	1	1	0	1	0	-	1	1	0	0	1	1	0	0	0	0	0	0	0	0	1	1	1	0	0	1	0	0	1	0	1	0	0	0	0	0	0	-	0	0	0	0	0	1	0
GGR4	D04_TS_04.rec	1	1	1	1	1	0	1	0	-	0	0	0	0	0	0	0	0	0	0	0	0	0	0	1	1	1	0	1	1	0	0	1	0	0	0	1	1	0	0	0	-	0	0	0	0	1	0	0
GGR4	D04_TS_05.rec	1	1	1	1	1	1	1	0	-	0	0	0	0	0	0	0	0	0	0	0	0	0	0	1	1	1	1	1	1	1	1	1	0	1	0	1	1	0	0	1	0	0	0	1	0	0	1	1
GGR4	D04_TS_06.rec	1	1	1	1	1	0	1	0	-	0	0	0	0	0	0	0	0	0	0	0	0	0	0	1	1	1	1	1	1	0	0	1	0	0	0	1	1	0	0	1	0	0	0	0	1	1	0	0
GGR4	D04_TS_08.rec	1	1	1	1	1	0	1	0	-	1	0	0	1	0	0	0	0	0	0	0	0	0	0	0	1	1	1	1	1	0	0	1	0	0	0	0	1	1	1	1	0	0	0	1	0	0	0	0
GGR4	D04_TS_09.rec	1	1	1	1	1	0	1	0	-	0	0	0	0	0	0	0	0	0	0	0	0	0	0	1	1	1	0	1	1	0	0	1	0	0	0	1	0	0	0	0	-	0	0	0	0	0	0	0
GGR4	D04_TS_10.rec	1	1	1	1	1	1	1	0	-	0	0	0	0	0	0	0	0	0	0	0	0	0	0	0	1	-	-	-	-	-	-	-	-	-	-	-	-	-		-	-	-	-	-	-	1	1	0
GGR4	D04_TS_11.rec	1	1	1	1	1	0	1	0	-	0	0	0	0	0	0	0	0	0	0	0	0	0	0	1	1	1	0	1	0	1	0	1	0	1	0	1	0	0	0	1	0	0	0	1	0	0	1	0
GGR4	D04_TS_12.rec	1	1	1	1	1	0	1	0	-	1	0	0	1	1	0	0	0	0	0	0	0	0	0	1	1	1	0	1	0	0	0	0	0	0	0	0	0	0	0	0	-	0	0	0	0	1	1	0
GGR4	D04_TS_13.rec	1	1	1	1	1	1	1	0	-	1	0	0	1	0	0	1	1	1	0	0	0	0	0	0	1	-	-	1	-	-	-	-	-	-	-	-	-	-		-	-	-	-	-	-	0	0	0
GGR4	D04_TS_14.rec	1	1	1	1	1	0	1	0	-	1	1	1	1	1	0	0	0	0	0	1	0	0	0	1	1	1	0	1	0	0	0	0	0	0	0	0	0	0	0	0	-	0	0	0	0	0	0	0
GGR4	D04_TS_15.rec	1	1	1	1	1	0	1	0	-	0	0	0	0	0	0	0	0	0	0	0	0	0	0	1	1	1	1	1	1	0	0	1	0	1	0	0	0	0	0	0	-	0	0	1	0	1	0	0
GGR5	D05_TS_01.rec	1	1	1	1	1	0	1	0	-	1	1	0	0	0	1	0	0	0	0	0	0	0	0	0	1	-	-	-	-	-	-	-	-	-	-	-	-	-		-	-	-	-	-	-	1	1	0
GGR5	D05_TS_02.rec	1	1	1	1	1	0	1	0	-	1	0	0	0	1	0	0	0	0	0	0	0	0	0	0	1	-	-	-	-	-	-	-	-	-	-	-	-	-		-	-	-	-	-	-	0	0	0
GGR5	D05_TS_03.rec	1	1	1	1	1	0	1	0	-	0	0	0	0	0	0	0	0	0	0	0	0	0	0	1	1	1	0	1	0	0	0	0	0	0	0	0	1	0	0	0	-	0	0	0	0	1	1	0
GGR5	D05_TS_04.rec	1	1	1	1	1	0	1	0	-	1	0	0	1	0	0	0	0	0	0	0	0	0	0	0	1	-	-	-	-	-	-	-	-	-	-	-	-	-		-	-	-	-	-	-	0	0	0
GGR5	D05_TS_05.rec	1	1	1	1	1	1	1	0	-	0	0	0	0	0	0	0	0	0	0	0	0	0	0	0	1	-	-	-	-	-	-	-	-	-	-	-	-	-		-	-	-	-	-	-	0	0	0
GGR5	D05_TS_06.rec	1	1	0	1	1	-	1	-	-	-	-	-	-	-	-	-	-	-	-	-	-	-	-	1	1	1	1	1	0	0	0	0	0	0	0	0	0	0	0	0	-	0	0	0	0	1	0	0
GGR5	D05_TS_08.rec	1	1	1	1	1	0	1	0	-	1	1	0	0	0	0	0	0	0	0	0	0	1	0	1	1	1	0	1	1	0	0	1	0	0	1	1	1	0	0	1	0	0	0	0	0	1	1	0
GGR5	D05_TS_09.rec	1	1	0	1	1	-	1	-	-	-	-	-	-	-	-	-	-	-	-	-	-	-	-	1	1	1	1	1	0	1	0	1	0	1	0	0	0	0	0	1	0	0	0	0	0	1	0	0
GGR5	D05_TS_10.rec	1	1	1	1	1	1	1	0	-	0	0	0	0	0	0	0	0	0	0	0	0	0	0	1	1	1	0	1	1	0	0	1	1	0	0	1	0	0	0	1	1	0	0	1	0	0	0	0
GGR5	D05_TS_11.rec	1	1	0	1	1	-	1	-	-	-	-	-	-	-	-	-	-	-	-	-	-	-	-	1	1	1	0	1	1	0	0	1	0	0	0	1	0	0	0	0	-	0	0	0	0	1	0	0
GGR5	D05_TS_12.rec	1	1	1	1	1	1	1	0	-	1	1	0	0	0	0	0	0	0	0	0	0	0	0	1	1	1	0	1	0	1	0	1	0	1	0	1	0	0	0	1	0	0	0	1	0	0	0	0
GGR5	D05_TS_14.rec	1	1	1	1	1	1	1	0	-	1	0	0	1	0	0	0	0	0	0	0	0	0	0	1	1	1	0	1	1	0	0	1	1	0	1	1	0	0	0	1	0	0	0	0	0	1	1	0
GGR5	D05_TS_17.rec	1	1	1	1	1	0	1	0	-	0	0	0	0	0	0	0	0	0	0	0	0	0	0	1	1	1	0	1	1	0	0	1	0	0	0	1	1	0	0	0	-	0	0	0	0	1	1	0
GGR5	D05_TS_18.rec	1	1	0	1	1	-	1	-	-	-	-	-	-	-	-	-	-	-	-	-	-	-	-	1	1	1	1	1	1	0	0	1	1	1	0	1	0	0	0	0	-	0	0	0	0	0	0	0
GGR5	D05_TS_19.rec	1	1	1	1	1	1	1	0	-	1	1	0	1	0	0	0	0	0	0	0	0	0	0	1	1	1	0	1	0	0	0	0	0	0	0	0	1	0	0	0	-	0	0	0	0	0	0	0
GGR5	D05_TS_20.rec	1	1	0	1	1	-	1	-	-	-	-	-	-	-	-	-	-	-	-	-	-	-	-	1	-	1	0	1	1	0	0	1	0	0	0	1	0	0	0	0	-	0	0	0	0	1	0	0
GGR5	D05_TS_24.rec	1	1	1	1	1	0	1	0	-	1	1	1	0	0	1	0	0	0	0	0	0	0	0	1	1	1	0	1	0	0	0	1	0	0	1	0	1	0	0	1	0	0	0	0	0	0	0	0
GGR5	D05_TS_26.rec	1	1	1	1	1	1	1	0	-	0	0	0	0	0	0	0	0	0	0	0	0	0	0	1	1	1	0	1	0	0	0	1	0	0	0	1	0	0	0	0	-	0	0	0	0	0	1	0
GGR5	D05_TS_27.rec	1	1	1	1	1	0	1	0	-	1	1	0	1	1	0	0	0	0	0	0	0	0	0	0	1	-	-	-	-	-	-	-	-	-	-	-	-	-		-	-	-	-	-	-	1	0	0
GGR5	D05_TS_29.rec	1	1	1	1	1	0	1	0	-	0	0	0	0	0	0	0	0	0	0	0	0	1	0	1	1	1	0	1	1	0	0	1	0	1	0	0	1	0	0	1	0	0	0	0	0	0	0	0
GGR5	D05_TS_30.rec	1	1	1	1	1	-	1	0	-	1	0	0	0	1	0	0	0	0	0	0	0	0	0	1	1	1	1	1	1	0	0	0	0	0	0	0	0	0	0	0	-	0	0	0	0	1	0	0
GGR5	D05_TS_31.rec	1	1	1	2	1	1	1	0	-	0	0	0	0	0	0	0	0	0	0	0	0	0	0	1	2	1	0	1	1	0	0	1	0	0	0	1	0	0	0	1	0	0	0	1	0	0	0	0
GGR5	D05_TS_32.rec	1	1	1	1	1	1	1	0	-	1	0	1	1	1	0	0	0	0	0	1	1	1	0	1	1	1	1	1	1	0	0	1	0	1	0	0	0	0	0	1	0	0	0	0	0	1	1	0
GGR5	D05_TS_33.rec	1	1	1	1	1	0	1	0	-	1	0	1	1	0	0	0	0	0	0	0	0	0	0	1	1	1	1	1	0	1	1	1	0	1	0	1	1	0	0	1	0	0	0	0	0	1	0	0
GGR5	D05_TS_34.rec	1	1	1	1	1	0	1	0	-	0	0	0	0	0	0	0	0	0	0	0	0	0	0	1	1	1	0	1	1	0	0	1	1	0	0	1	0	0	0	0	-	0	0	0	0	0	0	0
GGR5	D05_TS_36.rec	1	1	1	1	1	0	1	0	-	1	1	0	0	0	0	0	0	0	0	0	0	0	0	0	1	-	-	-	-	-	-	-	-	-	-	-	-	-		-	-	-	-	-	-	0	1	0
GGR5	D05_TS_37.rec	1	1	1	1	0	0	1	0	-	1	0	0	0	0	0	0	0	0	0	0	0	0	0	0	1	-	-	-	-	-	-	-	-	-	-	-	-	-		-	-	-	-	-	-	1	1	0
GGR3	D05_TS_38.rec	1	1	-	-	-	-	-	-	-	-	-	-	-	-	-	-	-	-	-	-	-	-	-	-	-	-	-	-	-	-	-	-	-	-	-	-	-	-		-	-	-	-	-	-	-	-	-
[truncated: 23 more columns]
